# Supplementary material
Source: PubMed Central journal article supplement (PMC4104898)
Supplement: 1403712111_pnas.201403712SI.pdf [file 1403712111_pnas.201403712SI.pdf]

# Supporting Information

Oscar et al. 10.1073/pnas.1403712111

## SI Text

### SI Materials and Methods

**Protein Sample Preparation.** To purify the green-blue dual-emission genetically encoded  $\text{Ca}^{2+}$  sensor for optical imaging (GEM-GECO1) for in vitro spectroscopic characterization, electrocompetent *Escherichia coli* DH10B cells was transformed with the pTorPE plasmid harboring 6-histidine tagged GEM-GECO1 (1). Following selection on Lysogeny broth (LB)/ampicillin (200  $\mu\text{g/mL}$ ; Sigma), single colonies were picked and used to inoculate 4 mL LB medium (200  $\mu\text{g/mL}$  ampicillin only). Bacterial subcultures were shaken at 250 rpm and allowed to grow overnight at 37 °C. The next day, 1 mL of bacterial subculture was added into 1 L of a modified terrific broth (TB) rich medium (1 L sterilized medium contains 20 g LB mix, 14 g trytone, 7 g yeast extract, 9.2 g  $\text{K}_2\text{HPO}_4$ , 2.2 g  $\text{KH}_2\text{PO}_4$ , and 8 mL glycerol, pH adjusted to 7.20) supplemented with 0.0020% (wt/vol) L-arabinose (Alfa Aesar). The cultures were shaken at 250 rpm and inoculated at 30 °C for 2 d. Bacteria were harvested by centrifugation (6,000 g for 5 min), resuspended in 30 mM Tris · HCl buffer (pH 7.4), lysed by French press, and clarified by centrifugation at 13,000 g for 30 min at 4 °C. Proteins were purified from the cell-free extract by nickel-nitrilotriacetic acid (Ni-NTA) affinity chromatography (Agarose Bead Technologies). The GEM-GECO1 protein was concentrated and the buffer of purified protein was exchanged to 10 mM 3-(N-morpholino)propanesulfonic acid (MOPS), 100 mM KCl, pH 7.2, supplemented with either 10 mM EGTA ( $\text{Ca}^{2+}$ -free sample) or 10 mM CaEGTA ( $\text{Ca}^{2+}$ -bound sample), using Amicon Ultra-4 Centrifugal Filter Unit (EMD Millipore Corporation). Absorption spectra of diluted samples were recorded on a DU-800 UV/visible spectrophotometer (Beckman) to ensure the absorbance of 392 nm (for  $\text{Ca}^{2+}$ -bound sample) or 398 nm (for  $\text{Ca}^{2+}$ -free sample) was above 2/mm for both undiluted samples.

**GEM-GECO1 Site-Specific Mutagenesis.** Synthetic DNA oligonucleotides used for GEM-GECO1 single mutagenesis experiments were purchased from Integrated DNA Technologies. The sequences of all oligonucleotides are provided in Table S4. QuikChange Lightning Single kit (Agilent Technologies) was used for site-directed single mutagenesis of GEM-GECO1 in pTorPE vector according to the manufacturer's instruction. Electrocompetent *E. coli* strain DH10B cells were transformed with the QuikChange product and cultured overnight at 37 °C on 10-cm Petri dishes of LB-agar supplemented with 200  $\mu\text{g/mL}$  ampicillin and 0.0020% (wt/vol) L-arabinose.

Clones were picked and cultured in liquid LB medium supplemented with 200  $\mu\text{g/mL}$  ampicillin and 0.0020% (wt/vol) L-arabinose at 37 °C overnight. Cells were harvested by centrifugation at 13,000 g for 2 min at 4 °C. Surfactant B-PER (Pierce) was used to lyse cells. After centrifugation at 13,000 g for 5 min at 4 °C, the cytoplasmic proteins including GEM-GECO1 and mutants in the supernatant were collected and purified by Ni-NTA affinity chromatography. The cell debris was treated for small-scale isolation of plasmid DNA using GeneJET miniprep kit (Fermentas); 5  $\mu\text{L}$  of each purified sample was added into 50  $\mu\text{L}$  of solution containing 10 mM MOPS, 100 mM KCl, pH 7.2 with either 10 mM EGTA ( $\text{Ca}^{2+}$ -free sample) or 10 mM CaEGTA ( $\text{Ca}^{2+}$ -bound sample) in a microplate well. Fluorescence spectra of GEM-GECO1 and its mutants in the presence and absence of  $\text{Ca}^{2+}$  were recorded on a Safire2 platereader (Tecan) with three replicates for each protein prep-

aration and at least two independent preparations for each mutant. For excitation spectra, the emission intensity was measured at 535 nm. To acquire emission spectrum of each variant, excitation at 395 nm was used. The cDNA sequences for all GEM-GECO1 mutants were confirmed by dye terminator cycle sequencing using the BigDye Terminator Cycle Sequencing kit (Applied Biosystems).

### Femtosecond Stimulated Raman Spectroscopy Measurements.

The excited-state femtosecond stimulated Raman spectroscopy (FSRS) experimental setup was previously reported (2, 3). In brief, we use a femtosecond mode-locked Ti:sapphire oscillator (Mantis-5) and regenerative laser amplifier (Legend Elite; Coherent) to provide  $\sim 35$  fs, 2 mJ pulse centered at  $\sim 800$  nm with 1-kHz repetition rate. The output laser is split into three beams to generate a Raman pump-probe pair and an actinic pulse for photoexcitation. About 500- $\mu\text{W}$  400-nm actinic pulse is generated through frequency doubling a small portion of the fundamental pulse in a 0.3-mm-thick  $\beta$ -barium borate (BBO) crystal (type I, phase-matching angle  $\theta = 27.8^\circ$ ), followed by prism (Suprasil-1; CVI Melles Griot) compression to  $\sim 40$  fs. About 1.2 W of the laser output is dispersed by a gold reflective grating (1,200 grooves/mm, first-order wavelength at 750 nm, blaze angle of  $26.7^\circ$ ) and passed through a 90- $\mu\text{m}$ -wide slit to generate the Raman pump with 800-nm center wavelength,  $\sim 6$ -mW power, and 3.5-ps pulse duration. The 100-nJ/pulse Raman probe beam at 840–960 nm (corresponding to ca. 600–2,000  $\text{cm}^{-1}$  Stokes Raman shift to the 800-nm pump pulse) from supercontinuum white light is generated in a 2-mm thick Z-cut sapphire crystal and compressed with a fused silica prism pair to  $\sim 35$  fs, followed by a long-pass filter (RG830; Newport). The crossing angle between the Raman probe and actinic pulse or Raman pump is  $\sim 3.5^\circ$  with the probe situated between the other two pulses.

For excited-state FSRS, the Raman pump and probe pulses remain temporally fixed at time zero, and the preceding actinic pump is controlled by a stepper-motor-driven translation stage. The protein sample solution (OD  $\sim 1/\text{mm}$  at 400 nm) is continuously flowed through a 1-mm pathlength quartz cell to avoid thermal effects and provides reasonable interaction length for the ensemble spectroscopic measurement (4). The stimulated Raman signal is collinear with the transmitted probe beam, which is selected to enter the spectrograph and dispersed by a 1,000-nm blaze, 600-grooves/mm grating, before being imaged onto a  $1,340 \times 100$  CCD array (PIXIS 100F; Princeton Instruments). This ensures the fluorescence rejection capability of the FSRS setup (4, 5). We collect at least 12 sets of excited-state FSRS data with 3,000 shots per point, so the spectrum at each time delay (from  $-5$  to 650 ps with various time steps, randomized in sequence to eliminate thermal effect or backslash, also limited by the length of the 10-cm translation stage that corresponds to  $\sim 667$  ps) is averaged for  $\geq 18,000$  times. The ground-state (GS) spectrum of the protein sample is collected periodically throughout the experiment to monitor sample conditions and provide a highly averaged trace for GS subtraction, and the retrieval of pure excited-state (ES) vibrational features after broad spectral baseline removal (6).

For kinetic analysis, individual Raman mode is least-squares fitted by a Gaussian curve with the center frequency and integrated intensity plotted against delay time. At least three time-resolved FSRS data sets were independently collected on different days to ensure reproducibility. The error bars in the ES vibrational peak kinetic plots (Figs. 3 and 4 and Figs. S2 and S3)

thus represent the “ $\pm \sigma$ ” given that the average value has been taken for each data point at each time delay (the sample size is 3 so  $n = 3$ ), and the spread is derived from the square root of the variance. Notably at each time delay, the FSRs experimental data average at least 18,000 excited-state Raman spectra so the signal-to-noise ratio is significantly enhanced over conventional continuous-wave (cw) Raman, and the spectral features can be clearly obtained. The multiexponential fit to the temporal profile of spectral features is all convoluted with the  $\sim 140$ -fs full-width-at-half-maximum (FWHM) instrument response function, measured from the cross-correlation time between the femtosecond photoexcitation pulse and the Raman probe pulse.

**More Insights into Excited-State Vibrational Peak Dynamics from FSRs.** Quantitative analysis of the ES peak frequency and intensity changes will lead to a clear portrait of atomic motions on the femtosecond to picosecond timescale following photoexcitation. Notably, the 1,663 and 1,004  $\text{cm}^{-1}$  modes (Fig. S1) are likely protein backbone modes because they do not appear in the ES spectrum after GS subtraction, and they are also absent in the Raman spectrum of a model compound for the GFP chromophore (7–9). The 1,138/1,147  $\text{cm}^{-1}$  phenol H-rocking mode in photoexcited  $\text{Ca}^{2+}$ -free/bound proteins exhibits the first decay time constant greater than 1 ps (i.e., 1.3/1.6 ps, respectively; Table S1), corroborating its assignment to a localized phenol H-rocking mode associated with a neutral chromophore, hence the longer initial decay to reach the vibrationally relaxed  $\text{A}^*$  state. In contrast, the neighboring higher-frequency mode at 1,180  $\text{cm}^{-1}$  exhibits a much faster initial decay time constant of 630–730 fs, which agrees with its assignment of a more delocalized mode associated with a partially deprotonated chromophore. Following photoexcitation, the 1,180  $\text{cm}^{-1}$  mode thus relaxes faster as the chromophore undergoes conformational motions out of the Franck–Condon (FC) region. The second (much longer) decay time constant reports on the dominant ES structural evolution on the picosecond timescale, which directly reports on whether or not excited-state proton transfer (ESPT) from  $\text{A}^*$  to an effectively deprotonated  $\text{I}^*$  state is the dominant reaction pathway.

The blueshift of the chromophore phenolic C—O stretching mode at 1,247/1,250 to 1,265  $\text{cm}^{-1}$  is observed in  $\text{Ca}^{2+}$ -free/bound GEM-GECO1 following 400-nm excitation (Fig. S1). This is because photoexcitation shifts electrons from the hydroxyl end toward the phenolic ring starting at time zero, hence strengthening the C—O bond to some extent. This initial step of electronic redistribution going from  $\text{A} \rightarrow \text{A}^*$  is conserved for the chromophore due to its photoacidity, regardless of its ESPT capabilities. The similarity of the mode dynamics on the sub-picosecond timescale attests the point, whereas the subsequent picosecond dynamics manifest the dramatic effect of ESPT without  $\text{Ca}^{2+}$  vs. trapped  $\text{A}^*$  state with  $\text{Ca}^{2+}$ . Moreover, the first decay time constant of the 1,305  $\text{cm}^{-1}$  mode (540 fs) is in general faster than other high-frequency modes in the  $\text{Ca}^{2+}$ -free protein (Table S1), suggesting that this bridge-H rocking mode projects strongly onto the initial wavepacket trajectory out of the FC region for the chromophore in preparation for ESPT.

As ESPT progresses, the 1,570  $\text{cm}^{-1}$  mode redshifts by  $\sim 30$   $\text{cm}^{-1}$  in the  $\text{Ca}^{2+}$ -free protein that reflects the electron conjugation change on the imidazolinone ring and possible contribution from the quinonelike character of the phenol ring in the intermediate green fluorescent state  $\text{I}^*$ . In resonance and surface-enhanced Raman experiments, this mode is the most prominent and has been implicated as the strongest mode along the initial reaction coordinate (8); lack of probe photons on the red side of the current spectral window in our setup accounts for a weakened peak with reduced signal-to-noise ratio. The absence of this mode redshift is apparent with  $\text{Ca}^{2+}$  (Fig. 2B).

The modes at 967, 885, and 819  $\text{cm}^{-1}$  (Fig. S2) are relatively long-lived in comparison with the modes above 1,000  $\text{cm}^{-1}$ . These modes are more persistent in the  $\text{Ca}^{2+}$ -bound protein, whereas the 967  $\text{cm}^{-1}$  mode blueshifts by  $\sim 10$   $\text{cm}^{-1}$  after  $\sim 30$  ps in the  $\text{Ca}^{2+}$ -free protein that suggests  $\text{I}^*$  formation. This trend is consistent with time-dependent density functional theory (TD-DFT) calculations (10) that predict a blueshift of this mode from GS to ES and the formation of  $\text{I}^*$  following ESPT (Fig. 2A). The imidazolinone ring deformation mode at 885  $\text{cm}^{-1}$  shows an overall larger decay time constant than the phenol ring modes at 819 and 967  $\text{cm}^{-1}$  (Table S1) in both the  $\text{Ca}^{2+}$ -free and -bound proteins, consistent with the argument that the ES structural evolution of the chromophore starts from the phenol ring (11) and propagates toward the imidazolinone ring, which takes relatively longer time to react and relax.

**Structural Insights for the  $\text{Ca}^{2+}$ -Free GEM-GECO1 from Molecular Dynamics Simulations.** To correlate the key mutations with functional changes of the local environment of the chromophore, we performed the equilibrium molecular dynamics (MD) simulations using Amber12 program (12). The coordinates of the  $\text{Ca}^{2+}$ -free GCaMP2 (PDB ID 3EKJ) (13) were used as the starting point. Because of its deficient structure, the missing part of CaM was padded with an independent  $\text{Ca}^{2+}$ -free CaM crystal structure (PDB ID 1CFD) (14) and the M13 helix was added from the  $\text{Ca}^{2+}$ -bound GCaMP3 (PDB ID 3SG3) (15). The crystallized water molecules from all three structures were kept. All of the GEM-GECO1 point mutations (1) were made using SwissPDB Viewer (16) and the missing residues (e.g., residue number 144–157 in the loop region) were added. Hydrogen (H) atoms for the protein were then added using the AmberTools13 package. Afterward, these structures were neutralized and solvated with 66,791 TIP3P water molecules within 20-Å radius of the protein. The entire protein complex system went through 5,000 steps of energy minimization, followed by 60-ps gradual heating from 0 to 300 K using the Langevin thermostat with a collision frequency of 2  $\text{ps}^{-1}$ , and 100 ps further equilibration without restraints. Subsequently, a 10-ns MD simulation was performed under constant temperature at 300 K, with a time step of 2 fs. The SHAKE method (an Amber algorithm based on dynamics to perform bond-length constraints) was used to keep all bonds involving the H atoms rigid. The output coordinates were recorded every 2 ps.

From the 10-ns trajectory, the potential energy of the system as a function of time was plotted and we selected the conformational snapshot with the lowest potential energy to represent the  $\text{Ca}^{2+}$ -free GEM-GECO1 structure (Fig. S4). During this MD simulation, the chromophore rigidity was not maintained very well, indicative of its flexibility in the protein pocket. The structures of CaM and M13 domains showed significant differences from the  $\text{Ca}^{2+}$ -bound GCaMP proteins [e.g., PDB ID 3EVR (17), 3SG3]. The CaM unit does not wrap around M13 and it remains extended as two subdomains, which conforms to the  $\text{Ca}^{2+}$ -free environment. In comparison with the starting structural coordinates, the orientation of M13 unit rotates upward due to the added CaM unit, which makes the  $\beta$ -barrel opening larger (Fig. S4A). In the lowest-energy structure, the chromophore phenol ring is slightly out of plane with the imidazolinone ring. In comparison with 3EKJ, the phenolic hydroxyl group of the chromophore occupies an almost conserved location, but the hydroxyl group of S118 rotates to a lower position, which makes its oxygen atom more in plane with the chromophore phenol ring. Notably, after the aforementioned energy minimization, two water molecules exist between the chromophore phenolic hydroxyl group and S118. One of the water molecules is largely in plane with the chromophore phenol ring and forming H bonds with S118 and the chromophore (Fig. S4B). Following the initial structural motion of the chromophore in the electronic excited



the GS chromophore (Figs. S5C, *Inset*, and S6), likely due to the conformation of the ionizable sidechain of E61. Notably, E61H also shows a shift of equilibrium population from  $A^*$  to  $I^*$  upon  $Ca^{2+}$  binding (Figs. S5C and S64), indicating that E61 hinders ESPT in the  $Ca^{2+}$ -bound state. Regarding the P60L mutant, an even larger decrease in the  $A^*$  to  $I^*$  emission ratio (excitation at 395 nm) for the  $Ca^{2+}$ -bound protein was observed (Figs. S5B and S64), and the fluorescence of the deprotonated chromophore (B state) increases about twofold upon binding to  $Ca^{2+}$  (Figs. S5B and S6C). This indicates that P60 does contribute to ESPT disruption upon  $Ca^{2+}$  binding so P60L greatly reduces the dual-emission color contrast from green to blue emission. Given the slight effect of the E61H mutation, we suggest that the P60L mutation may influence the fluorescent properties via a conformational change of N62 or V63, both of which are in closer proximity to the chromophore phenolic end.

Proteins with V116T or S118G mutations in the FP domain exhibit fluorescence spectra and  $Ca^{2+}$ -dependent responses that are similar to those of GEM-GECO1, with a few notable differences. V116T and S118G both exhibit poor protein-folding efficiency at 37 °C so structural variation particularly at the local environment level is possible. In comparison with GEM-GECO1, S118G mutant shows a substantial increase in the  $A^*$  to  $I^*$  emission ratio for the  $Ca^{2+}$ -free protein (Figs. S5E, *Inset*, and S64) with S118G exhibiting a twofold higher ratio. This result suggests that S118 has a role besides structured water molecules in facilitating ESPT ( $A^* \rightarrow I^*$ ) in the  $Ca^{2+}$ -free state of GEM-GECO1. Both variants also have a substantial increase in the 474 to 402 nm excitation ratio (Fig. S6B) and decrease in the green emission upon 395-nm excitation (Fig. S6D), indicative of reduced quantum yield of  $I^*$  green fluorescence regardless of the presence or absence of  $Ca^{2+}$ . Residue V116 is situated below the chromophore ring plane and its inability to participate in a H-bonding network with the chromophore (24, 25) may be playing a role in the 170  $cm^{-1}$  in-plane phenol ring rocking motion to facilitate ESPT in the  $Ca^{2+}$ -free protein (see main text and Fig. 5).

The P377R variant has the largest decrease of  $A^*$  to  $I^*$  emission ratio in the presence of  $Ca^{2+}$  (Fig. S64), indicating that this protein cannot effectively disrupt ESPT to thereby fluoresce from a trapped  $A^*$  state. This result indicates that P377 plays a critical role in preventing ESPT in the presence of  $Ca^{2+}$ . Because P377 is not itself ionizable and most likely does not interact directly with the chromophore, it is plausible that this residue is exerting influence through conformational positioning of other nearby, yet unidentified, residues at the FP-CaM interface. Because the formation of the interfacial region at the  $Ca^{2+}$ -bound state reduces access of water molecules to the chromophore, a hydrophobic residue X (potential candidates include M375 and M379 near P377) of CaM can point to the phenol group of the chromophore and exclude nearby water molecules, which lead to trapping of the  $A^*$  state upon UV light excitation and blueshift of the absorption peak (Fig. 1B; 398  $\rightarrow$  392 nm for the  $Ca^{2+}$ -free  $\rightarrow$   $Ca^{2+}$ -bound protein). Because the ground-state Raman spectrum of GEM-GECO1 remains largely unchanged upon  $Ca^{2+}$  binding (Fig. S1C), we consider that the blueshift of the absorption maximum is mainly due to the modification of the excited-state PES by those nearby hydrophobic residues (26). In the P377R mutant, this blueshift disappears (Fig. S5F), confirming that P377 is crucial to establish the hydrophobic local environment to inhibit ESPT. Meanwhile, the aforementioned P60 may play a minor role in fine tuning the geometry of residue X by adjusting the position and orientation of the M13/CaM complex. That explains the second-largest drop of the  $A^*$  over  $I^*$  emission in the  $Ca^{2+}$ -bound protein of the P60L mutant (Figs. S5B and S64).

**Further Discussion of Fluorescence Modulation Mechanism in GEM-GECO1.** Time-resolved FSRS spectra stem from the conformational dynamics of the chromophore surrounded by the protein pocket. Because only the chromophore absorbs at 400 nm, the rest of the protein acts as a transparent medium and thus does not contribute to the ES spectrum after GS subtraction (4, 6). It was shown that the fluorescence of canonical GCaMPs is primarily modulated by  $Ca^{2+}$ -dependent changes in chromophore  $pK_a$  and solvent access to the chromophore (13, 17). In comparison with wtGFP, the GCaMP chromophore is more solvent accessible due to circular permutation of the  $\beta$ -barrel (Fig. 1A). GCaMP3, for example, lacks a true equivalent of H148 that plays a key functional role in wtGFP (Table S3). However, an interfacial R377 of CaM is considered to be functionally similar even though it is much farther away and the interaction with the chromophore is likely mediated by structured water molecules (13, 17).

In the  $Ca^{2+}$ -free GEM-GECO1, the tertiary-structure-altering L60P mutation from its GCaMP progenitor may extend the  $\beta$ -strand at the C terminus hence excluding more solvent and pushing away E61, therefore favoring ESPT. This is consistent with our mutagenesis studies that show the  $Ca^{2+}$ -free protein with E61H mutation having more deprotonated chromophore in GS (Figs. S5C, *Inset*, and S6C) because H61 is a better proton acceptor to coordinate the phenolic end of the chromophore, functionally similar to H148 in wtGFP that also promotes a small population of the partially deprotonated chromophore in GS (27). Also in GEM-GECO1, the labile (not conserved) water molecules in the partially open  $\beta$ -barrel pocket and the presence of the T116V mutation at the equivalent wtGFP position of T203 (Table S3) contribute to the ESPT efficiency decrease and the lower quantum yield (QY) ( $\sim 0.31$ , for 511-nm emission in the  $Ca^{2+}$ -free protein; ref. 1) in comparison with wtGFP (QY  $\sim 0.8$  for 508-nm emission; ref. 28) upon  $\sim 400$  nm excitation.

In particular, the T116V mutation in GCaMPs mildly affects their fluorescence behavior (13, 29) but promotes a neutral GS chromophore. Fig. 1B shows this effect in GEM-GECO1 that has a valine residue (V116) at the corresponding position below the chromophore ring plane. Upon V116T mutagenesis reversion into GEM-GECO1, a slight increase of the anionic GS chromophore population (Fig. S6B and C) as well as decreased  $I^*$  emission (via ESPT process from  $A^*$ ; Fig. S6D) in the  $Ca^{2+}$ -free protein were observed. This result suggests the functional role of a largely in-plane vibrational motion that facilitates the ESPT reaction in the  $Ca^{2+}$ -free GEM-GECO1.

The observed 170  $cm^{-1}$  phenol-ring in-plane rocking motion may be ubiquitous in GFP-like proteins that lack the strategic threonine residue (e.g., T203 in wtGFP, with the sidechain hydroxyl for H bonding) but are still capable of ESPT. The reaction speed depends on the distance from the chromophore phenolic end to the serine residue along the ESPT path, the time for bridging water molecule(s) to rearrange, and the degree of  $I^*$  stabilization by surrounding residues. In comparison with the previously reported 120  $cm^{-1}$  phenol-ring out-of-plane wagging motion that gates ESPT (4), it is evident that ESPT typically requires one dominant low-frequency skeletal motion to facilitate directional proton transfer, and the characteristic skeletal motion will be selected on the basis of the chromophore local environment. The PES dictates the wavepacket Hamiltonian thus strongly projects certain structurally relevant modes along the chemical reaction coordinate, and in this excited-state case, bioluminescence.

#### Full authorship of Gaussian 09

Gaussian 09, Revision B.1, M. J. Frisch, G. W. Trucks, H. B. Schlegel, G. E. Scuseria, M. A. Robb, J. R. Cheeseman, G. Scalmani, V. Barone, B. Mennucci, G. A. Petersson, H. Nakatsuji, M. Caricato, X. Li, H. P. Hratchian, A. F. Izmaylov, J. Bloino, G. Zheng,

J. L. Sonnenberg, M. Hada, M. Ehara, K. Toyota, R. Fukuda, J. Hasegawa, M. Ishida, T. Nakajima, Y. Honda, O. Kitao, H. Nakai, T. Vreven, J. A. Montgomery, Jr., J. E. Peralta, F. Ogliaro, M. Bearpark, J. J. Heyd, E. Brothers, K. N. Kudin, V. N. Staroverov, R. Kobayashi, J. Normand, K. Raghavachari, A. Rendell, J. C. Burant, S. S. Iyengar, J. Tomasi, M. Cossi, N. Rega, J. M. Millam,

M. Klene, J. E. Knox, J. B. Cross, V. Bakken, C. Adamo, J. Jaramillo, R. Gomperts, R. E. Stratmann, O. Yazyev, A. J. Austin, R. Cammi, C. Pomelli, J. W. Ochterski, R. L. Martin, K. Morokuma, V. G. Zakrzewski, G. A. Voth, P. Salvador, J. J. Dannenberg, S. Dapprich, A. D. Daniels, Ö. Farkas, J. B. Foresman, J. V. Ortiz, J. Cioslowski, and D. J. Fox, Gaussian, Inc., Wallingford CT, 2009.

- Zhao Y, et al. (2011) An expanded palette of genetically encoded  $\text{Ca}^{2+}$  indicators. *Science* 333(6051):1888–1891.
- Liu W, Han F, Smith C, Fang C (2012) Ultrafast conformational dynamics of pyranine during excited state proton transfer in aqueous solution revealed by femtosecond stimulated Raman spectroscopy. *J Phys Chem B* 116(35):10535–10550.
- Han F, Liu W, Fang C (2013) Excited-state proton transfer of photoexcited pyranine in water observed by femtosecond stimulated Raman spectroscopy. *Chem Phys* 422(0):204–219.
- Fang C, Frontiera RR, Tran R, Mathies RA (2009) Mapping GFP structure evolution during proton transfer with femtosecond Raman spectroscopy. *Nature* 462(7270):200–204.
- McCamant DW, Kukura P, Yoon S, Mathies RA (2004) Femtosecond broadband stimulated Raman spectroscopy: Apparatus and methods. *Rev Sci Instrum* 75(11):4971–4980.
- Frontiera RR, Fang C, Dasgupta J, Mathies RA (2012) Probing structural evolution along multidimensional reaction coordinates with femtosecond stimulated Raman spectroscopy. *Phys Chem Chem Phys* 14(2):405–414.
- Bell AF, He X, Wachter RM, Tonge PJ (2000) Probing the ground state structure of the green fluorescent protein chromophore using Raman spectroscopy. *Biochemistry* 39(15):4423–4431.
- Schellenberg P, Johnson E, Esposito AP, Reid PJ, Parson WW (2001) Resonance Raman scattering by the green fluorescent protein and an analogue of its chromophore. *J Phys Chem B* 105(22):5316–5322.
- He X, Bell AF, Tonge PJ (2002) Isotopic labeling and normal-mode analysis of a model green fluorescent protein chromophore. *J Phys Chem B* 106(23):6056–6066.
- Frisch MJ, et al. (2009) *Gaussian 09, Revision B.1* (Gaussian, Inc., Wallingford, CT).
- Granucci G, Hynes JT, Millie P, Tran-Thi T-H (2000) A theoretical investigation of excited-state acidity of phenol and cyanophenols. *J Am Chem Soc* 122(49):12243–12253.
- Case DA, et al. (2012) AMBER 12. (University of California, San Francisco, CA).
- Akerboom J, et al. (2009) Crystal structures of the GCaMP calcium sensor reveal the mechanism of fluorescence signal change and aid rational design. *J Biol Chem* 284(10):6455–6464.
- Kuboniwa H, et al. (1995) Solution structure of calcium-free calmodulin. *Nat Struct Biol* 2(9):768–776.
- Akerboom J, et al. (2012) Optimization of a GCaMP calcium indicator for neural activity imaging. *J Neurosci* 32(40):13819–13840.
- Gueux N, Peitsch MC (1997) SWISS-MODEL and the Swiss-PdbViewer: An environment for comparative protein modeling. *Electrophoresis* 18(15):2714–2723.
- Wang Q, Shui B, Kotlikoff MI, Sondermann H (2008) Structural basis for calcium sensing by GCaMP2. *Structure* 16(12):1817–1827.
- Lochbrunner S, Wurzer AJ, Riedle E (2000) Ultrafast excited-state proton transfer and subsequent coherent skeletal motion of 2-(2'-hydroxyphenyl)benzothiazole. *J Chem Phys* 112(24):10699–10702.
- Lochbrunner S, Stock K, Riedle E (2004) Direct observation of the nuclear motion during ultrafast intramolecular proton transfer. *J Mol Struct* 700(1-3):13–18.
- Huse N, et al. (2005) Anharmonic couplings underlying the ultrafast vibrational dynamics of hydrogen bonds in liquids. *Phys Rev Lett* 95(14):147402.
- Kukura P, Frontiera R, Mathies RA (2006) Direct observation of anharmonic coupling in the time domain with femtosecond stimulated Raman scattering. *Phys Rev Lett* 96(23):238303.
- Fang C, Senes A, Cristian L, DeGrado WF, Hochstrasser RM (2006) Amide vibrations are delocalized across the hydrophobic interface of a transmembrane helix dimer. *Proc Natl Acad Sci USA* 103(45):16740–16745.
- Wilson KC, Lyons B, Mehlenbacher R, Sabatini R, McCamant DW (2009) Two-dimensional femtosecond stimulated Raman spectroscopy: Observation of cascading Raman signals in acetonitrile. *J Chem Phys* 131(21):214502–214515.
- Kummer AD, et al. (2000) Effects of threonine 203 replacements on excited-state dynamics and fluorescence properties of the green fluorescent protein (GFP). *J Phys Chem B* 104(19):4791–4798.
- Jung G, Wiehler J, Zumbusch A (2005) The photophysics of green fluorescent protein: Influence of the key amino acids at positions 65, 203, and 222. *Biophys J* 88(3):1932–1947.
- Hanson GT, et al. (2002) Green fluorescent protein variants as ratiometric dual emission pH sensors. 1. Structural characterization and preliminary application. *Biochemistry* 41(52):15477–15488.
- Shu X, et al. (2007) Ultrafast excited-state dynamics in the green fluorescent protein variant S65T/H148D. 1. Mutagenesis and structural studies. *Biochemistry* 46(43):12005–12013.
- Chattoraj M, King BA, Bublitz GU, Boxer SG (1996) Ultra-fast excited state dynamics in green fluorescent protein: Multiple states and proton transfer. *Proc Natl Acad Sci USA* 93(16):8362–8367.
- Chen Y, et al. (2013) Structural insight into enhanced calcium indicator GCaMP3 and GCaMPJ to promote further improvement. *Protein Cell* 4(4):299–309.

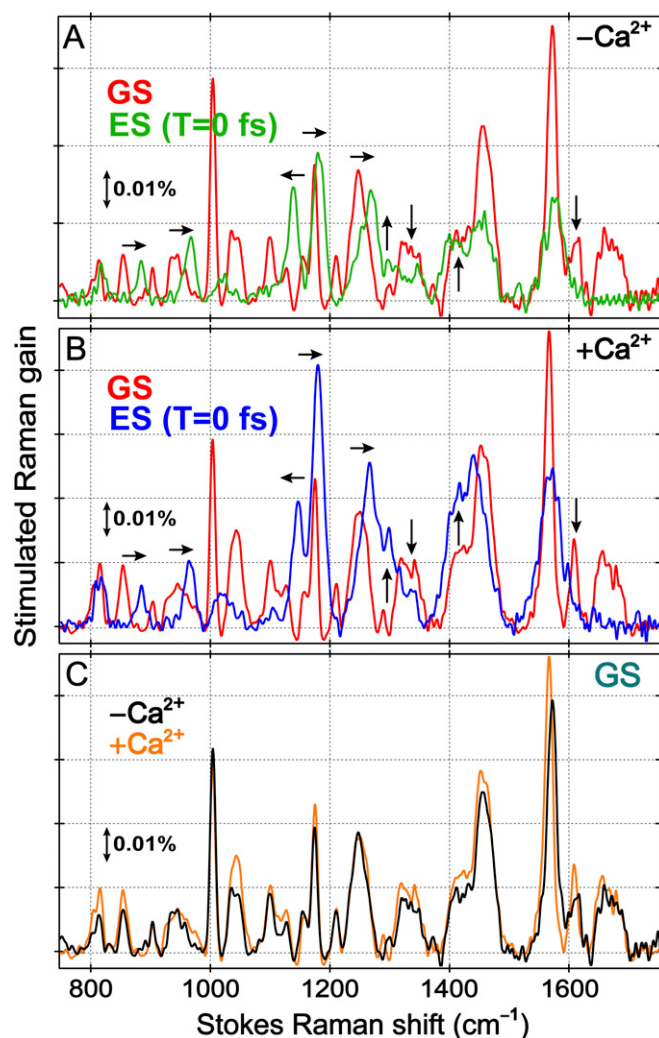

**Fig. S1.** Raman spectral comparison of GEM-GE01 in  $S_0$  and  $S_1$  at photoexcitation time zero. (A) GS (red) and  $T = 0$  fs ES (green) Raman spectra of the  $\text{Ca}^{2+}$ -free protein. (B) GS (red) and  $T = 0$  fs ES (blue) Raman spectra of the  $\text{Ca}^{2+}$ -bound protein. (C) Ground-state Raman spectra of the  $\text{Ca}^{2+}$ -free (black) and bound (orange) proteins. Besides the broadband Raman probe pulse, the GS spectra were recorded with a  $\sim 800$  nm Raman pump, and an additional  $\sim 400$  nm actinic pump was used to collect the ES spectra. Because only  $\sim 10\%$  of the GS population converts to ES via photoexcitation, resonance enhancement is achieved in  $S_1$ , that leads to comparable spectral intensities with those in  $S_0$  (4). Both protein samples had an optical absorbance of  $\sim 1/\text{mm}$  at 400 nm. The absolute stimulated Raman gain strength of 0.01% is shown with the double-headed line. The similarity between the GS spectra in C regardless of  $\text{Ca}^{2+}$  binding (Table S1) reveals the largely conserved nature of the protein pocket in  $S_0$  at thermal equilibrium. The time-resolved spectral differences (Figs. 2 and 3) are more significant than the static ground-state differences not only owing to resonance enhancement in  $S_1$ , but also due to the altered structural evolution pathways of GEM-GE01 in the excited state upon  $\text{Ca}^{2+}$  binding. The main frequency shifts and intensity changes of the chromophore modes upon photoexcitation are indicated by black arrows in A and B, which are largely induced by ultrafast (i.e.,  $< 140$  fs the instrument cross-correlation time) electronic redistribution within the FC region.

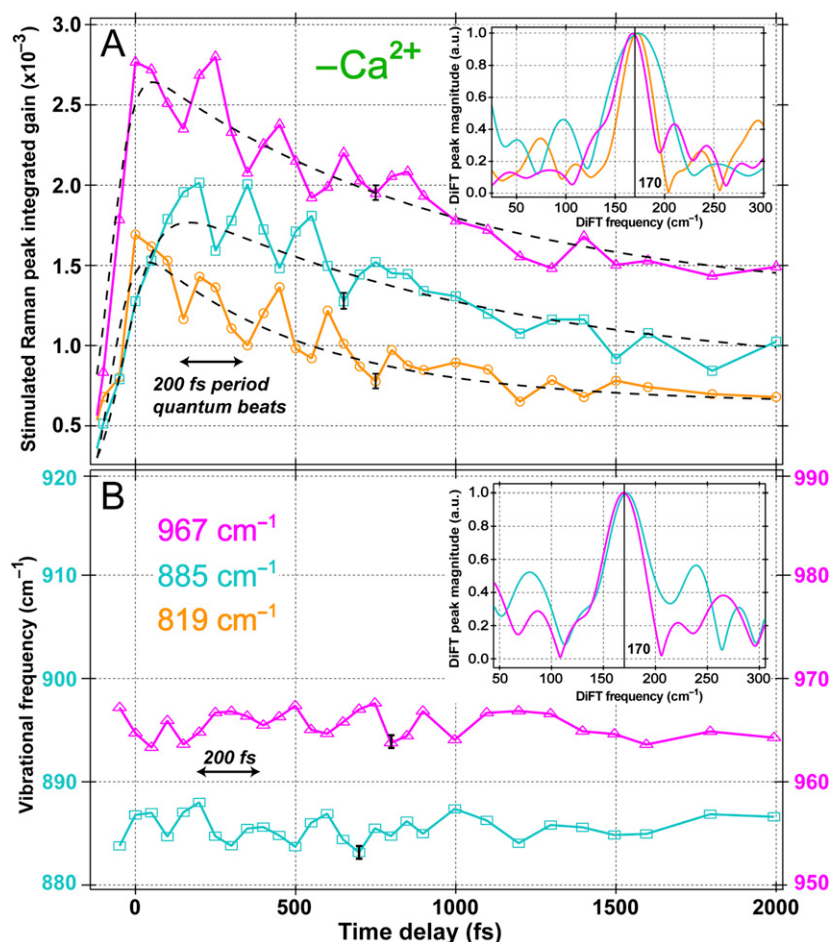

**Fig. S2.** Temporal evolution and quantum beats of three vibrational modes between 800 and 1,000  $\text{cm}^{-1}$  of the  $\text{Ca}^{2+}$ -free GEM-GECO1 following 400-nm photoexcitation. (A) Peak intensity oscillations of the three stimulated Raman modes within 2 ps. The two phenol ring deformation modes at 819 and 967  $\text{cm}^{-1}$  clearly oscillate in phase, whereas the 885  $\text{cm}^{-1}$  mode oscillation is out of phase. This is attributed to a periodically modulated electronic distribution over the chromophore two-ring system due to the impulsively excited coherent motion at  $\sim 170 \text{ cm}^{-1}$  (Figs. 4 and 5), shown in the *Inset*, which modifies the geometry of the phenol ring and its surroundings to facilitate subsequent ESPT with a  $\sim 30 \text{ ps}$  time constant (Table S1). These modes have been offset vertically to manifest the coherent oscillatory features. The underlying modulation mode at  $\sim 170 \text{ cm}^{-1}$  (marked by the vertical black line in the *Inset*) is retrieved after performing the discrete Fourier transform (DFT) of the quantum beats, which are oscillatory residuals after subtracting the data traces with the multi-exponential fits (black dashed lines) within 2 ps. (B) The frequencies of the 967 and 885  $\text{cm}^{-1}$  modes also manifest  $180^\circ$  out-of-phase oscillations relative to each other with a  $\sim 200 \text{ fs}$  modulation period (shown by double-arrowed lines). The initial frequency redshift of the 967  $\text{cm}^{-1}$  phenol deformation mode (magenta, right axis) and concomitant rise of the 885  $\text{cm}^{-1}$  imidazolinone mode (cyan, left axis) is consistent with the initial electronic redistribution across the conjugated ring system of the chromophore following photoexcitation. The typical error bar (SD) for each experimental trace is depicted on one data point in the middle region. The DiFT spectra of the frequency quantum beats are shown in the *Inset*, also manifesting a dominant low-frequency mode at  $\sim 170 \text{ cm}^{-1}$  and the anharmonic coupling between this collective skeletal motion and the other high-frequency vibrational modes along the ESPT reaction coordinate.

**A**

**B**

Glu 135

Ser 223

Gly 225

Ser 118

Tyr 224

2.0 Å

3.0 Å

1.7 Å

2.8 Å

8 of 12





**Table S1. Kinetic data and mode assignments for excited-state peaks of GEM-GECO1**

| FSRS* (cm <sup>-1</sup> ) | Calc. <sup>†</sup> (cm <sup>-1</sup> ) | S <sub>0</sub> FSRS (cm <sup>-1</sup> ) | Kinetics <sup>‡</sup> -Ca <sup>2+</sup>            | Kinetics <sup>‡</sup> +Ca <sup>2+</sup> | Mode assignment (dominant motions)                                                                     |
|---------------------------|----------------------------------------|-----------------------------------------|----------------------------------------------------|-----------------------------------------|--------------------------------------------------------------------------------------------------------|
| 819                       | 818                                    | 814                                     | (-) 1.1 ps (60%);<br>65 ps (40%)                   | (-) 1.8 ps (48%);<br>700 ps (52%)       | Phenol ring breathing (1, 2, 3) <sup>§</sup>                                                           |
| 885                       | 874                                    | 855                                     | (-) 1.1 ps (50%);<br>80 ps (50%)                   | (-) 1.2 ps (40%);<br>840 ps (60%)       | Imidazolinone-ring deformation and C-C stretch plus bridge CH wagging (2, 3)                           |
| 967                       | 967 <sup>¶</sup>                       | 941                                     | (-) 1.0 ps (62%);<br>40 ps (38%)                   | (-) 1.0 ps (60%);<br>680 ps (40%)       | Phenol ring deformation (2, 3)                                                                         |
| 1,138                     | 1,141                                  | 1,155                                   | (-) 1.3 ps (50%);<br>42 ps (50%)                   | (-) 1.6 ps (55%);<br>837 ps (45%)       | Ring H scissoring, bridge C-H rocking, and phenolic COH rock (1, 4)                                    |
| 1,147 <sup>  </sup>       |                                        | 1,157 <sup>  </sup>                     |                                                    |                                         |                                                                                                        |
| 1,180                     | 1,178                                  | 1,174                                   | (-) 730 fs (60%);<br>27 ps (40%)                   | (-) 630 fs (65%);<br>592 ps (35%)       | Ring and bridge C-H rocking, phenolic COH rocking, and imidazolinone ring deformation (1, 4-6)         |
| 1,265                     | 1,256                                  | 1,247<br>1,250 <sup>  </sup>            | (-) 670 fs (64%);<br>34 ps (36%)                   | (-) 620 fs (62%);<br>468 ps (38%)       | Phenolic C-O stretch (1, 4-6)                                                                          |
| 1,305                     | 1,292                                  | N/A                                     | (-) 540 fs, (+) 31 ps,<br>(-) 4.1 ns <sup>**</sup> | (-) 700 fs (60%);<br>472 ps (40%)       | Bridge and phenol ring H rock with minor C-O stretch and COH rock (4, 6)                               |
| 1,300 <sup>  </sup>       |                                        |                                         |                                                    |                                         |                                                                                                        |
| 1,400                     | 1,407                                  | 1,411                                   | (-) 550 fs (60%);<br>41 ps (40%)                   | (-) 650 fs (70%);<br>840 ps (30%)       | C-N stretch, bridge and phenol ring H rocking, small C = C stretching (5, 7)                           |
| 1,446                     | 1,449                                  | 1,455                                   | (-) 675 fs (65%);<br>33 ps (35%)                   | (-) 740 fs (68%);<br>830 ps (32%)       | C-N stretch, bridge and phenol ring H rocking, C-H and N-H wagging at the imidazolinone ring (1, 4, 7) |
| 1,442 <sup>  </sup>       |                                        | 1,452 <sup>  </sup>                     |                                                    |                                         |                                                                                                        |
| 1,540                     | 1,536 <sup>††</sup>                    | N/A                                     | (+) 28 ps; (-) 930 ps <sup>**</sup>                | N/A                                     | C = N and C-N stretch with a C = O (phenol) stretching component (1, 5, 6)                             |
| 1,570                     | 1,571                                  | 1,568                                   | (-) 680 fs (61%);<br>36 ps (39%)                   | (-) 592 fs (58%);<br>900 ps (42%)       | C = N stretch with some C = C stretching and C = O stretching motions (1, 4, 6, 7)                     |
| 1,565 <sup>  </sup>       |                                        | 1,564 <sup>  </sup>                     |                                                    |                                         |                                                                                                        |

\*The frequency is reported as an average of the mode frequencies from -100 fs to 1 ps to account for the spectral oscillatory behavior in the electronic excited state.

<sup>†</sup>The ES vibrational frequencies of a geometrically optimized neutral SYG chromophore were calculated with TD-DFT RB3LYP 6-31G+(d,p) in water (IEF-PCM-H<sub>2</sub>O). The calculated frequencies are all with a scaling factor of 0.96.

<sup>‡</sup>A general observation is that in both Ca<sup>2+</sup>-free and bound GEM-GECO1 samples the mode decay lengthens as the vibrational frequency decreases. The modes listed are primarily associated with A\* state of the photoexcited neutral chromophore except the 1,305 and 1,540 cm<sup>-1</sup> modes in the Ca<sup>2+</sup>-free protein. For the 1,540 cm<sup>-1</sup> mode, the rise time constant correlates with the A\* → I\* transition (ESPT process), whereas the decay time constant reports the energy relaxation of the I\* state via fluorescence emission and/or other faster nonradiative processes.

<sup>§</sup>Representative literature that made similar normal mode assignment is listed.

<sup>¶</sup>This represents an averaged frequency of two calculated modes at ca. 959 and 975 cm<sup>-1</sup> that both involve phenol ring deformation plus some minor C-N stretching motion.

<sup>||</sup>The mode in the Ca<sup>2+</sup>-bound protein.

<sup>\*\*</sup>The rise component in these fits all starts at ~4 ps, after which the I\* mode dynamics dominate.

<sup>††</sup>Calculated from the optimized deprotonated chromophore at the same level of theory. This is a nascent I\* mode.

1. Fang C, Frontiera RR, Tran R, Mathies RA (2009) Mapping GFP structure evolution during proton transfer with femtosecond Raman spectroscopy. *Nature* 462(7270):200-204.
2. Tozzini V, et al. (2003) The low frequency vibrational modes of green fluorescent proteins. *Chem Phys* 287(1-2):33-42.
3. Gnanasekaran R (2013) Normal modes and the Duschinsky mixing of the ground- and excited-state vibrations of the green fluorescent protein chromophore. *Chem Phys Lett* 587(0):61-67.
4. Schellenberg P, Johnson E, Esposito AP, Reid PJ, Parson WW (2001) Resonance Raman scattering by the green fluorescent protein and an analogue of its chromophore. *J Phys Chem B* 105(22):5316-5322.
5. Bell AF, He X, Wachter RM, Tonge PJ (2000) Probing the ground state structure of the green fluorescent protein chromophore using Raman spectroscopy. *Biochemistry* 39(15):4423-4431.
6. He X, Bell AF, Tonge PJ (2002) Isotopic labeling and normal-mode analysis of a model green fluorescent protein chromophore. *J Phys Chem B* 106(23):6056-6066.
7. Esposito AP, Schellenberg P, Parson WW, Reid PJ (2001) Vibrational spectroscopy and mode assignments for an analog of the green fluorescent protein chromophore. *J Mol Struct* 569(1-3):25-41.

**Table S2. Ground-state Raman peak assignments for GEM-GECO1  $\pm$ Ca<sup>2+</sup>**

| FRRS in ground state $S_0$ (cm <sup>-1</sup> ) | Calculated* (cm <sup>-1</sup> ) | Mode assignment (dominant motions)                                                                             |
|------------------------------------------------|---------------------------------|----------------------------------------------------------------------------------------------------------------|
| 814                                            | 813                             | Phenol ring breathing                                                                                          |
| 855                                            | 851                             | Imidazolinone ring deformation with minor phenol ring deformation                                              |
| 904                                            | 908                             | Phenol ring asymmetric HOOP <sup>†</sup> and bridge C–H wagging                                                |
| 941                                            | 939                             | Phenol ring HOOP                                                                                               |
| 960                                            | 951                             | Phenol ring asymmetric HOOP                                                                                    |
| 1,041                                          | 1,049 <sup>‡</sup>              | Imidazolinone ring deformation and C–H wags                                                                    |
| 1,100                                          | 1,085                           | Phenolic COH rocking, ring-H scissoring and some phenol ring breathing                                         |
| 1,125                                          | 1,128                           | Phenol ring COH rocking, ring-H scissoring, bridge C–H rocking                                                 |
| 1,155/1,157 <sup>§</sup>                       | 1,156                           | Strong phenol ring COH rocking, ring-H scissoring, bridge C–H rocking, and some imidazolinone ring deformation |
| 1,174                                          | 1,185                           | Delocalized phenol-H rocking, bridge C–H rocking, and imidazolinone deformation plus some sidechain motion     |
| 1,209                                          | 1,216                           | Phenol ring-H rocking, bridge C–H rocking, and imidazolinone ring C–C stretching                               |
| 1,247/1,250 <sup>§</sup>                       | 1,241                           | Strong phenol C–O stretch with some ring-H rocking                                                             |
| 1,322/1,320 <sup>§</sup>                       | 1,322                           | Phenolic COH rocking, ring-H rocking, bridge C–H rocking, and phenol ring deformation                          |
| 1,343                                          | 1,347                           | Bridge C–H rocking (strong) with imidazolinone C–N stretching and phenolic COH rocking components              |
| 1,411                                          | 1,412                           | Phenolic and imidazolinone C = C, C–C and C–N stretching, phenolic COH rocking, bridge C–H rocking             |
| 1,455/1,452 <sup>§</sup>                       | 1,453                           | Imidazolinone deformation and sidechain N–H wags                                                               |
| 1,568/1,564 <sup>§</sup>                       | 1,570                           | Imidazolinone C = N stretching with phenolic C = C stretching                                                  |

\*The ground-state Raman frequencies were calculated from an optimized SYG chromophore capped with methyl groups with DFT RB3LYP 6–31G+(d,p) in water (IEF-PCM-H<sub>2</sub>O). All of the calculated frequencies are with a scaling factor of 0.96.

<sup>†</sup>HOOP stands for hydrogen out-of-plane motion.

<sup>‡</sup>This represents an averaged frequency of the two calculated modes at ca. 1028 and 1070 cm<sup>-1</sup> that both involve imidazolinone ring deformation with some minor C–H wagging motion.

<sup>§</sup>The vibrational mode frequency in the Ca<sup>2+</sup>-bound GEM-GECO1 protein.

**Table S3. Functional residues in wtGFP (1) and GEM-GECO1 (2–5) representative structures from PDB**

| wtGFP residues (2WUR)             | GEM-GECO1 residues (3SG3/3EKJ/3EVR)                                                                                                                                                                                  |
|-----------------------------------|----------------------------------------------------------------------------------------------------------------------------------------------------------------------------------------------------------------------|
| S65-Y66-G67 (chromophore)<br>H148 | S223-Y224-G225 (chromophore)<br>No residue at this position. R377 in GCaMP is functionally equivalent; L60 and E61 are most similar in position. However, GEM-GECO1 has R377P and L60P mutations ( <i>SI Text</i> ). |
| T203                              | V116                                                                                                                                                                                                                 |
| S205 and E222                     | S118 and E135                                                                                                                                                                                                        |

The relevant GCaMP crystal structures are used to represent GEM-GECO1 because no crystal structure is available for the latter protein. The GCaMP3 structure 3SG3 has V116, whereas the GCaMP2 structures (3EKJ/3EVR) have T116. All of them have a TYG chromophore.

- Shinobu A, Palm GJ, Schierbeek AJ, Agmon N (2010) Visualizing proton antenna in a high-resolution green fluorescent protein structure. *J Am Chem Soc* 132(32):11093–11102.
- Zhao Y, et al. (2011) An expanded palette of genetically encoded Ca<sup>2+</sup> indicators. *Science* 333(6051):1888–1891.
- Akerboom J, et al. (2009) Crystal structures of the GCaMP calcium sensor reveal the mechanism of fluorescence signal change and aid rational design. *J Biol Chem* 284(10):6455–6464.
- Wang Q, Shui B, Kotlikoff MJ, Sondermann H (2008) Structural basis for calcium sensing by GCaMP2. *Structure* 16(12):1817–1827.
- Leder L, et al. (2010) The structure of Ca<sup>2+</sup> sensor Case16 reveals the mechanism of reaction to low Ca<sup>2+</sup> concentrations. *Sensors (Basel)* 10(9):8143–8160.

**Table S4. Oligonucleotides used for GEM-GECO1 site-specific mutagenesis**

| Mutation | Sequence                                  |
|----------|-------------------------------------------|
| P60L     | aggtcggctgagctcactagagaacgtgtatataa       |
| E61H     | ggctcggctgagctcaccacataacgtgtatataaaggcc  |
| V116T    | ccgacaaccactacgtgagcaccagtcacatacttcgaaga |
| S118G    | cactacgtgagcgtgagggcactatcttcgaagaccc     |
| P377R    | ttcctgacaatgatggcagcaaatgcaggacacagaca    |
